*Mean Places for 1871, January 1, of 78 Stars near the South Pole, observed at the Royal Observatory, Cape of Good Hope, in the Year 1871.*

(Contributed by E. J. Stone, M.A., F.R.S., Her Majesty's Astronomer at the Cape of Good Hope.)

| No. | Stars' Names.         | Mag. | Number of Obs. above and below Pole. | Total Number of Obs. | Mean R.A. Jan. 1, 1871. |    |       | Frac- tion of Year. 1871. | Mean N.P.D. Jan. 1, 1871. | No. in               |        |          |
|-----|-----------------------|------|--------------------------------------|----------------------|-------------------------|----|-------|---------------------------|---------------------------|----------------------|--------|----------|
|     |                       |      |                                      |                      | h                       | m  | s     |                           |                           | Brisbane.            | B.A.C. | Johnson. |
| 1   | Lacaille 9745         | 7    | { S.P. 4 }<br>2                      | 6                    | 0                       | 1  | 54.28 | .49                       | 176 45 26.83              |                      |        |          |
| 2   | " 23                  | 6    | { S.P. 1 }<br>1                      | 2                    | 0                       | 8  | 22.79 | .51                       | 175 42 46.02              | 18                   |        | 40       |
| 3   | Octantis              | 6.5  | 3                                    | 3                    | 0                       | 13 | 5.35  | .58                       | 179 4 49.15               | 32                   |        | 71       |
| 4   | Lacaille 228          | 7    | { S.P. 3 }<br>1                      | 4                    | 0                       | 36 | 25.29 | .54                       | 175 57 37.54              |                      |        |          |
| 5   | " 242                 | 7    | { S.P. 1 }<br>1                      | 2                    | 0                       | 38 | 50.69 | .47                       | 176 7 11.72               |                      |        |          |
| 6   | " 248                 | 6.5  | { S.P. 3 }<br>1                      | 4                    | 0                       | 39 | 53.75 | .54                       | 176 24 29.50              |                      |        |          |
| 7   | " 293                 | 7    | { S.P. 4 }<br>2                      | 6                    | 0                       | 46 | 8.91  | .53                       | 176 35 46.07              |                      |        |          |
| 8   | " 634                 | 6    | { S.P. 6 }<br>6                      | 12                   | 1                       | 45 | 7.74  | .54                       | 175 25 12.34              |                      |        |          |
| 9   | " 760                 | 7    | { S.P. 2 }<br>3                      | 5                    | 2                       | 3  | 46.61 | .52                       | 175 39 38.01              |                      |        |          |
| 10  | " 764                 | 6    | { S.P. 3 }<br>3                      | 6                    | 2                       | 5  | 48.12 | .53                       | 175 22 21.98              |                      |        |          |
| 11  | " 1029                | 7    | { S.P. 3 }<br>10                     | 13                   | 2                       | 40 | 14.61 | .52                       | 176 17 10.55              |                      |        |          |
| 12  | " 1146                | 7    | { S.P. 1 }<br>4                      | 5                    | 2                       | 51 | 58.96 | .50                       | 175 33 35.44              |                      |        |          |
| 13  | " 1884                | 7    | { S.P. 2 }<br>6                      | 8                    | 2                       | 53 | 32.08 | .55                       | 178 57 4.10               |                      |        |          |
| 14  | " 1203                | 7    | { S.P. 2 }<br>9                      | 11                   | 3                       | 4  | 35.28 | .53                       | 176 22 54.69              |                      |        |          |
| 15  | " 1848                | 7    | { S.P. 2 }<br>7                      | 9                    | 3                       | 22 | 32.13 | .57                       | 178 40 47.62              |                      |        |          |
| 16  | " 1414                | 7    | S.P. 9                               | 9                    | 3                       | 47 | 20.23 | .53                       | 175 8 13.86               |                      |        |          |
| 17  | " 1592                | 6.5  | S.P. 6                               | 6                    | 4                       | 6  | 46.03 | .56                       | 175 38 14.06              |                      |        |          |
| 18  | " 1839                | 7    | S.P. 7                               | 7                    | 4                       | 37 | 30.85 | .50                       | 176 33 1.91               |                      |        |          |
| 19  | " 2296                | 6    | S.P. 6                               | 6                    | 5                       | 55 | 13.87 | .46                       | 174 50 28.24              | 1165                 |        | 1960     |
| 20  | " 2512                | 6    | S.P. 2                               | 2                    | 6                       | 13 | 45.33 | .57                       | 175 55 28.17              | 1269                 |        | 2085     |
| 21  | " 3274                | 6.5  | S.P. 6                               | 6                    | 7                       | 31 | 24.85 | .51                       | 176 48 37.42              |                      |        |          |
| 22  | Brisbane 2007         | 8    | S.P. 4                               | 4                    | 8                       | 8  | 45.55 | .50                       | 175 34 13.96              |                      |        |          |
| 23  | A Octantis            | 7    | S.P. 4                               | 4                    | 8                       | 13 | 14.00 | .57                       | 178 29 27.53              | 2298                 |        | 2878     |
| 24  | Lacaille 3759         | 6.5  | S.P. 4                               | 4                    | 8                       | 45 | 19.44 | .48                       | 176 7 6.80                | { 2302 }<br>{ 2308 } |        |          |
| 25  | ζ Octantis, Lac. 3953 | 5.5  | S.P. 5                               | 5                    | 9                       | 14 | 55.90 | .48                       | 175 8 34.65               | 2491                 |        | 3211     |

Downloaded from https://academic.oup.com/mnras/article/33/1/55/979951 by guest on 19 April 2024

1872MNRAS...33...55S

| No. | Stars' Names.      | Mag.               | Number<br>of Obs.<br>above and<br>below Pole. | Total<br>Number<br>of<br>Obs. | Mean R.A. |    |       | Frac-<br>tion of<br>Year. | Mean N.P.D. |    |       | Brisbane. | No. in<br>B.A.C. |
|-----|--------------------|--------------------|-----------------------------------------------|-------------------------------|-----------|----|-------|---------------------------|-------------|----|-------|-----------|------------------|
|     |                    |                    |                                               |                               | h         | m  | s     |                           | 1871.       | o  | '     |           |                  |
| 26  | *                  | { 7.5 }<br>{ 7.0 } | S.P. 3                                        | 3                             | 9         | 48 | 25.76 | .53                       | 175         | 25 | 7.18  |           |                  |
| 27  | Lacaille 4169      | 6.5                | S.P. 7                                        | 7                             | 9         | 48 | 39.56 | .54                       | 175         | 25 | 6.72  |           |                  |
| 28  | " 4342             | 7                  | { S.P. 1 }<br>{ S.P. 4 }                      | 5                             | 10        | 11 | 53.56 | .48                       | 176         | 16 | 56.40 |           |                  |
| 29  | *                  | 7                  | { S.P. 2 }<br>{ S.P. 3 }                      | 5                             | 10        | 31 | 10.14 | .45                       | 175         | 53 | 56.62 |           |                  |
| 30  | *                  | 7                  | S.P. 3                                        | 3                             | 10        | 31 | 13.83 | .57                       | 178         | 51 | 32.34 |           |                  |
| 31  | Lacaille 4510      | 6.5                | { S.P. 3 }<br>{ S.P. 6 }                      | 9                             | 10        | 38 | 19.48 | .45                       | 175         | 25 | 16.95 |           |                  |
| 32  | " 4578             | 7                  | { S.P. 2 }<br>{ S.P. 7 }                      | 9                             | 10        | 47 | 35.38 | .46                       | 176         | 13 | 11.83 |           |                  |
| 33  | " 4708             | 7                  | S.P. 3                                        | 3                             | 11        | 7  | 50.11 | .53                       | 175         | 2  | 59.30 | 3491      |                  |
| 34  | " 4731             | 7                  | S.P. 3                                        | 3                             | 11        | 10 | 49.00 | .54                       | 175         | 31 | 46.72 | 3525      |                  |
| 35  | Brisbane 3618      | 7                  | { S.P. 3 }<br>{ S.P. 4 }                      | 7                             | 11        | 23 | 28.19 | .47                       | 174         | 14 | 42.69 | 3618      |                  |
| 36  | *                  | 7                  | { S.P. 1 }<br>{ S.P. 3 }                      | 4                             | 11        | 26 | 23.86 | .53                       | 178         | 32 | 1.86  |           |                  |
| 37  | Lacaille 4865      | 7                  | { S.P. 3 }<br>{ S.P. 4 }                      | 7                             | 11        | 34 | 27.70 | .48                       | 174         | 46 | 21.04 | 3722      |                  |
| 38  | " 4991             | 6                  | { S.P. 3 }<br>{ S.P. 4 }                      | 7                             | 11        | 55 | 57.79 | .47                       | 174         | 54 | 48.16 | 3884      | 4058             |
| 39  | Brisbane 3962      | 7                  | { S.P. 1 }<br>{ S.P. 2 }                      | 3                             | 12        | 7  | 27.35 | .51                       | 177         | 41 | 52.67 | 3962      |                  |
| 40  | Lacaille 5107      | 6                  | { S.P. 4 }<br>{ S.P. 2 }                      | 6                             | 12        | 15 | 32.81 | .47                       | 175         | 26 | 5.39  | 4018      | 4164             |
| 41  | Brisbane 4091      | 7                  | { S.P. 2 }<br>{ S.P. 3 }                      | 5                             | 12        | 32 | 25.19 | .52                       | 179         | 5  | 26.49 | 4091      |                  |
| 42  | Octantis Lac. 5268 | 5                  | { S.P. 2 }<br>{ S.P. 2 }                      | 4                             | 12        | 41 | 41.67 | .50                       | 174         | 25 | 17.69 | 4187      | 4293             |
| 43  | Lacaille 5325      | 7                  | { S.P. 5 }<br>{ S.P. 4 }                      | 9                             | 12        | 53 | 9.70  | .49                       | 176         | 51 | 53.02 | 4253      |                  |
| 44  | " 5452             | 7                  | { S.P. 3 }<br>{ S.P. 3 }                      | 6                             | 13        | 15 | 39.93 | .50                       | 175         | 9  | 17.85 | 4410      | 4460             |
| 45  | " 5444             | 7                  | { S.P. 4 }<br>{ S.P. 3 }                      | 7                             | 13        | 16 | 42.42 | .51                       | 176         | 3  | 32.99 |           |                  |
| 46  | Octantis Lac. 5482 | 5                  | { S.P. 5 }<br>{ S.P. 4 }                      | 9                             | 13        | 20 | 32.50 | .51                       | 175         | 7  | 20.07 | 4445      | 4483             |
| 47  | *                  |                    | { S.P. 1 }<br>{ S.P. 5 }                      | 6                             | 13        | 28 | 39.49 | .54                       | 176         | 58 | 13.75 |           |                  |
| 48  | Brisbane 4614      |                    | { S.P. 7 }<br>{ S.P. 4 }                      | 11                            | 13        | 55 | 44.07 | .53                       | 178         | 46 | 55.69 | 4614      |                  |
| 49  | Octantis Lac. 5823 | 6.7                | { S.P. 7 }<br>{ S.P. 2 }                      | 9                             | 14        | 27 | 42.60 | .53                       | 177         | 36 | 52.75 | 4886      | 4790 32          |
| 50  | Lacaille 5882      | 7                  | { S.P. 4 }<br>{ S.P. 1 }                      | 5                             | 14        | 29 | 24.14 | .50                       | 175         | 56 | 8.08  |           |                  |
| 51  | " 6441             | 7                  | 4                                             | 4                             | 16        | 8  | 55.21 | .52                       | 177         | 19 | 13.52 |           |                  |

| No. | Stars' Names.        | Mag. | Number of Obs. above and below Pole. | Total Number of Obs. | Mean R.A. Jan. 1, 1871. |    |       | Frac- tion of Year. 1871. | Mean N.P.D. Jan. 1, 1871. |    |       | No. in    |        |          |
|-----|----------------------|------|--------------------------------------|----------------------|-------------------------|----|-------|---------------------------|---------------------------|----|-------|-----------|--------|----------|
|     |                      |      |                                      |                      | h                       | m  | s     |                           | °                         | '  | "     | Brisbane. | B.A.C. | Johnson, |
| 52  | Brisbane 5607        | 6.7  | 5                                    | 5                    | 16                      | 13 | 25.33 | .50                       | 176                       | 6  | 34.06 | 5607      | 5412   | 388      |
| 53  | *                    | 7    | 4                                    | 4                    | 16                      | 51 | 26.51 | .56                       | 177                       | 7  | 32.39 |           |        |          |
| 54  | *                    | 7    | 3                                    | 3                    | 16                      | 51 | 29.35 | .56                       | 177                       | 15 | 12.51 |           |        |          |
| 55  | Lacaille 7078        | 7    | 6                                    | 6                    | 17                      | 20 | 58.38 | .56                       | 175                       | 9  | 2.38  |           |        |          |
| 56  | Brisbane 6058        | 6    | 8                                    | 8                    | 17                      | 38 | 51.49 | .49                       | 177                       | 39 | 15.44 | 6058      | 5936   | 433      |
| 57  | " 6229               | 7    | 5                                    | 5                    | 17                      | 58 | 56.40 | .55                       | 176                       | 16 | 6.77  | 6229      |        |          |
| 58  | ♄ Octantis Lac. 6295 | 6    | 7                                    | 7                    | 18                      | 8  | 11.93 | .50                       | 179                       | 16 | 42.00 | 5912      | 5959   | 423      |
| 59  | Lacaille 7442        | 7    | 2                                    | 2                    | 18                      | 13 | 59.24 | .56                       | 175                       | 40 | 37.16 |           |        |          |
| 60  | " 7751               | 7    | 8                                    | 8                    | 18                      | 51 | 55.28 | .49                       | 174                       | 56 | 5.50  |           |        |          |
| 61  | " 8257               | 7    | 2                                    | 2                    | 20                      | 11 | 24.13 | .51                       | 174                       | 50 | 12.41 |           |        |          |
| 62  | *                    | 7    | 4                                    | 4                    | 20                      | 45 | 55.48 | .56                       | 175                       | 42 | 48.03 |           |        |          |
| 63  | *                    | 6    | 3                                    | 3                    | 20                      | 48 | 54.78 | .48                       | 176                       | 9  | 38.31 |           |        |          |
| 64  | Lacaille 8474        | 7    | 3                                    | 3                    | 20                      | 49 | 50.76 | .53                       | 175                       | 16 | 20.76 |           |        |          |
| 65  | " 8511               | 7    | 3                                    | 3                    | 20                      | 54 | 2.37  | .51                       | 174                       | 50 | 2.33  |           |        |          |
| 66  | B Octantis           | 6.7  | 6                                    | 6                    | 20                      | 57 | 19.03 | .51                       | 179                       | 26 | 24.17 | 6644      | 7020   | 496      |
| 67  | Lacaille 8551        | 7    | 4                                    | 4                    | 21                      | 3  | 40.69 | .49                       | 175                       | 21 | 19.08 |           |        |          |
| 68  | " 8626               | 7    | 4                                    | 4                    | 21                      | 20 | 42.74 | .50                       | 176                       | 25 | 9.16  |           |        |          |
| 69  | " 8751               | 7    | 3                                    | 3                    | 21                      | 27 | 34.58 | .48                       | 174                       | 32 | 52.76 |           |        |          |
| 70  | " 8720               | 6.7  | 6                                    | 6                    | 21                      | 27 | 46.32 | .51                       | 175                       | 37 | 29.53 |           |        |          |
| 71  | " 8738               | 7    | 5                                    | 5                    | 21                      | 40 | 16.33 | .49                       | 177                       | 5  | 49.44 |           |        |          |
| 72  | C Oct. Lac. 8924     | 6    | { S.P. 7 }<br>{ S.P. 1 }             | 8                    | 22                      | 6  | 8.90  | .51                       | 176                       | 37 | 9.91  | 7119      | 7713   | 549      |
| 73  | Lacaille 9123        | 7    | { S.P. 3 }<br>{ S.P. 1 }             | 4                    | 22                      | 29 | 13.97 | .47                       | 174                       | 24 | 50.16 |           |        |          |
| 74  | ♄ Octantis           |      | { S.P. 6 }<br>{ S.P. 3 }             | 9                    | 23                      | 7  | 26.93 | .46                       | 178                       | 11 | 20.58 | 7421      |        | 578      |
| 75  | Lacaille 9401        | 7    | { S.P. 5 }<br>{ S.P. 3 }             | 8                    | 23                      | 15 | 51.82 | .44                       | 176                       | 25 | 4.80  |           |        |          |
| 76  | " 9464               | 7    | { S.P. 3 }<br>{ S.P. 1 }             | 4                    | 23                      | 26 | 32.36 | .51                       | 177                       | 6  | 40.72 |           |        |          |
| 77  | " 9563               | 7    | { S.P. 4 }<br>{ S.P. 1 }             | 5                    | 23                      | 38 | 55.25 | .49                       | 174                       | 34 | 45.08 |           |        |          |
| 78  | " 9596               | 7    | { S.P. 4 }<br>{ S.P. 3 }             | 7                    | 23                      | 43 | 59.15 | .49                       | 176                       | 36 | 49.27 |           |        |          |

1872, October 3.

*Note on an Observing Chair for use with Reflecting Telescopes of the Newtonian Construction.* By John Browning.

The model of the observing chair, which I now exhibit, is made principally from suggestions I have received from Mr.

1872MNRAS...33...57B
